# Supplementary material for: Efficacy of coenzyme Q10 in patients with chronic kidney disease: protocol for a systematic review
Source: PubMed Central journal article supplement — BMJ Open. 2019 May 14;9(5):e029053. doi: 10.1136/bmjopen-2019-029053 (PMC6530451; doi:10.1136/bmjopen-2019-029053), 2019-05-14
Supplement: bmjopen-2019-029053.draft_revisions.pdf [file bmjopen-2019-029053.draft_revisions.pdf]

# BMJ Open

BMJ Open is committed to open peer review. As part of this commitment we make the peer review history of every article we publish publicly available.

When an article is published we post the peer reviewers' comments and the authors' responses online. We also post the versions of the paper that were used during peer review. These are the versions that the peer review comments apply to.

The versions of the paper that follow are the versions that were submitted during the peer review process. They are not the versions of record or the final published versions. They should not be cited or distributed as the published version of this manuscript.

BMJ Open is an open access journal and the full, final, typeset and author-corrected version of record of the manuscript is available on our site with no access controls, subscription charges or pay-per-view fees (<http://bmjopen.bmj.com>).

If you have any questions on BMJ Open's open peer review process please email [info.bmjopen@bmj.com](mailto:info.bmjopen@bmj.com)

# BMJ Open

## Efficacy of coenzyme Q10 in patients with chronic kidney disease: Protocol for a systematic review

|                               |                                                                                                                                                                                                                                                       |
|-------------------------------|-------------------------------------------------------------------------------------------------------------------------------------------------------------------------------------------------------------------------------------------------------|
| Journal:                      | <i>BMJ Open</i>                                                                                                                                                                                                                                       |
| Manuscript ID                 | bmjopen-2019-029053                                                                                                                                                                                                                                   |
| Article Type:                 | Protocol                                                                                                                                                                                                                                              |
| Date Submitted by the Author: | 10-Jan-2019                                                                                                                                                                                                                                           |
| Complete List of Authors:     | Xu, Yongxing; the 306th hospital of Chinese PLA<br>Liu, Juan; the 306th hospital of Chinese PLA<br>Han, Enhong; the 306th hospital of Chinese PLA<br>Wang, Yan; the 306th hospital of Chinese PLA<br>Gao, Jianjun; the 306th hospital of Chinese PLA, |
| Keywords:                     | Coenzyme Q10, chronic kidney disease, cardiovascular, oxidative stress, inflammation, glucose metabolism                                                                                                                                              |
|                               |                                                                                                                                                                                                                                                       |

SCHOLARONE™  
Manuscripts

1  
2  
3  
4 **Efficacy of coenzyme Q10 in patients with chronic kidney disease: Protocol for a**  
5 **systematic review**  
6  
7  
8

9 Yongxing Xu, Juan Liu, Enhong Han, Yan wang, Jianjun Gao

10 Department of Nephrology, The 306<sup>th</sup> Hospital of Chinese PLA, Beijing, China  
11  
12  
13  
14  
15  
16  
17

18 Corresponding author's information:  
19

20 Address: Jianjun Gao, Department of Nephrology, The 306<sup>th</sup> Hospital of Chinese PLA,  
21 9 AnXiangBeiLi Road, Beijing 100101, PR China.  
22  
23

24 Tel: +86-10-66356929  
25

26 Fax:+86-10-68130297  
27

28 E-mail: [gao306kidney@126.com](mailto:gao306kidney@126.com)  
29  
30  
31  
32  
33  
34  
35  
36  
37  
38  
39  
40  
41  
42  
43  
44  
45  
46  
47  
48  
49  
50  
51  
52  
53  
54  
55  
56  
57  
58  
59  
60

## Abstract

**Introduction** Coenzyme Q10 (CoQ10) is a fat-soluble vitamin-like quinone that exerts antioxidative functions and is also an important factor in mitochondrial metabolism. Plasma concentrations of CoQ10 are depressed in patients with chronic kidney disease (CKD). A CoQ10 supplement can reduce adverse cardiovascular events, improve mitochondrial function, and decrease oxidative stress in patients with non-dialysis CKD and dialysis CKD. We performed this study as a systematic review to comprehensively assess the effect of a CoQ10 supplement on patients with CKD.

**Methods and analysis** The present systematic review protocol will be conducted following the PRISMA-P guidelines. The MEDLINE, EMBASE, and Cochrane library databases will be searched without language restrictions. Two reviewers will independently screen the references in two stages: screening of the title/abstract and then of the full-text, to identify references meeting the inclusion criteria. A descriptive overview and tabular and/or graphical summaries will be generated, and directed content analysis will be carried out on the extracted data.

**Ethics and dissemination** This systematic review will evaluate the efficacy and safety of CoQ10 in patients with CKD. Because all data used in this systematic review and meta-analysis will have been published, this review will not require ethical approval. Furthermore, all data will be analyzed anonymously during the review trial.

**Keywords:** Coenzyme Q10; chronic kidney disease; cardiovascular; oxidative stress; inflammation; glucose metabolism, lipid profiles

### Strengths and limitations of this study

- The first comprehensive systematic review of the effects of a CoQ10 supplement on cardiovascular, oxidative stress, inflammation, glucose metabolism, lipid profiles, all-cause mortality, safety and tolerability in patients with CKD.
- The methodological design and statistical analysis are very strong and robust.
- Both patients with non-dialysis CKD and those undergoing dialysis are to be included.
- The review is restricted to articles published between January 2008 and February 2019.

## Introduction

The mortality rate of patients with chronic kidney disease (CKD) increases with a decrease in the glomerular filtration rate. Cardiovascular diseases, such as coronary artery disease, congestive heart failure and sudden cardiac death, represent the leading cause of morbidity and mortality in patients with CKD, particularly those who have reached end-stage renal disease.<sup>1</sup> Diabetes, hypertension, and obesity are traditional risk factors for cardiovascular disease, which are all more prevalent in patients with CKD.<sup>2</sup> In addition to the traditional risk factors, oxidative stress is also a key contributor to the pathogenesis of atherosclerosis and other cardiovascular diseases in patients undergoing maintenance hemodialysis.<sup>3</sup> Oxidative stress originates from multiple sources, including decoupling of the electron transport chain in the mitochondria and inflammation-mediated production of superoxide via NADPH oxidase. Oxidative stress, inflammation, and endothelial dysfunction are detectable even at the very early stage of CKD.<sup>4</sup>

Coenzyme Q10 (CoQ10) is a fat-soluble vitamin-like quinone, also known as ubiquinone, that exerts antioxidative functions. CoQ10 transports electrons from complexes 1 or 2 to complex 3 in mitochondria.<sup>5</sup> CoQ10 treatment decreases superoxide production in endothelial cells and improves cardiac capacity in patients with heart failure.<sup>6</sup> Long-term therapy with CoQ10 can reduce major adverse cardiovascular events, and is safe and well-tolerated by the general population.<sup>7</sup> Plasma concentrations of CoQ10 are depressed in patients with non-dialysis CKD, and in those undergoing dialysis.<sup>8,9</sup> Depleting CoQ10 leads to inefficient electron transport and increased reactive oxygen species production. CoQ10 supplementation may improve mitochondrial function and decrease oxidative stress in patients undergoing hemodialysis.<sup>7,10</sup> CoQ10 may have potential for preventing and treating cardiovascular disease, improving cardiac function, and decreasing oxidative stress in patients with CKD. CoQ10 may have favorable effects on cardiac function, hypertension, glucose metabolism, lipid profiles, inflammation, and oxidative stress in patients with non-dialysis CKD and those undergoing dialysis, but the results remain

1  
2  
3  
4 controversial. One recent meta-analysis showed that CoQ10 supplementation  
5 significantly improves the metabolic profile of patients with CKD.<sup>11</sup> However, no  
6 published study has systematically and comprehensively summarized the effects of  
7 CoQ10 on cardiovascular outcomes, inflammation, oxidative stress, glucose  
8 metabolism, and lipid profiles.  
9

10  
11  
12  
13 The aim of this systematic review will be to systematically appraise the evidence  
14 regarding the effects of CoQ10 supplementation in patients with CKD.  
15  
16

## 21 **Objectives**

22  
23 The primary objective of this systematic review will be to assess the benefit of  
24 administering CoQ10 to patients with CKD. This protocol is reported in accordance  
25 with the PRISMA-P 2015 checklist<sup>12</sup>. This protocol was previously registered with  
26 the International Prospective Register of Systematic Reviews (PROSPERO).  
27  
28  
29

## 33 **Methods**

### 35 **Inclusion criteria, exclusion criteria, and pre-specified outcomes**

36  
37 The included trials will meet the following criteria: (1) randomized-controlled,  
38 quasi-randomized, non-randomized trial, or observational study; (2) participants with  
39 CKD; (3) the intervention of interest was CoQ10 treatment; (4) the comparator was  
40 adult patients with CKD who did not receive the intervention.  
41  
42  
43  
44

45  
46 The primary outcomes will be cardiovascular effects, including:

- 47 1) Cardiac function and structure: left ventricular ejection fraction (determined by  
48 echocardiography or contrast or radionuclide angiography); diastolic heart function;  
49 cardiac structure (measured by individual trials);
  - 50 2) Biomarkers of cardiac function, such as brain natriuretic peptide and  
51 N-terminal-pro-b-type natriuretic peptide;
  - 52 3) Blood pressure and heart rate;
- 53  
54  
55  
56  
57  
58  
59  
60

1  
2  
3  
4 4) Symptom improvement (measured by individual trials and/or by exercise capacity),  
5 quality of life (measured by individual trials);  
6

7 5) Major cardiovascular event (cardiovascular mortality, non-fatal myocardial  
8 infarction, non-fatal stroke, and re-vascularization procedures);  
9  
10

11  
12  
13 Secondary outcomes of interest include effects on oxidative stress, inflammation,  
14 glucose metabolism, lipid profiles, all-cause mortality, safety, and tolerability.  
15  
16

### 17 18 19 **Database and search strategy**

20  
21 Searches will be performed, with no date restrictions, of the MEDLINE via Ovid,  
22 EMBASE via Ovid, and Cochrane Library (Cochrane Central Register of Controlled  
23 Trials) electronic databases, using relevant text words and medical subject headings,  
24 as follows: kidney diseases, renal replacement therapy, renal insufficiency, dialysis,  
25 predialysis, diabetic nephropathies, ubiquinone, ubidecarenone, coenzyme Q10,  
26 co-enzyme Q10, and quinone. The clinicaltrials.gov website will be searched for  
27 relevant studies that have been registered and completed but remain to be published.  
28 The reference lists of articles and other reviews retrieved during the search or known  
29 to the authors will be searched for relevant articles. There will be no language  
30 restrictions.  
31  
32  
33  
34  
35  
36  
37  
38  
39  
40  
41  
42

### 43 **Study selection and data extraction**

44 Two independent reviewers will assess the eligibility of the trials with a standardized  
45 approach. Discrepancies will be resolved by discussion with a third individual. Two  
46 authors will independently extract data, including baseline patient characteristics,  
47 follow-up duration, intervention, outcome events, and adverse events using a  
48 standardized data collection form. Any further information required from the original  
49 investigators will be requested by written correspondence, and any relevant  
50 information obtained in this manner will be included in the review.  
51  
52  
53  
54  
55  
56  
57  
58  
59  
60



### Assessing the risk of bias

Two authors will independently assess the risk of bias of the randomized controlled trials according to the standard criteria. Seven different bias domains, including random sequence generation (selection bias), allocation concealment (selection bias), blinding of participants and personnel (performance bias), blinding of outcome assessment (detection bias), incomplete outcome data (attrition bias), selective reporting (reporting bias), and any other potential biases will be categorized as low risk of bias, high risk of bias, or unclear risk of bias<sup>13</sup>. Observational studies will be evaluated with the Newcastle–Ottawa Scale<sup>14</sup>.

### Statistical analysis

A meta-analysis will be performed if sufficient data are available. The results of dichotomous outcomes will be expressed as risk ratios (RRs) or odds ratios (OR) with 95% confidence intervals (CIs) for individual studies. For outcomes measured by continuous scales of measurement, the mean difference (MD) and 95% CI will be used. For trials with endpoints with zero events in the treatment arm, RRs will be calculated using a 0.5 cell correction.<sup>15</sup> There is no reason to assume that the effects being estimated in the different studies will not be identical; therefore, the random-effect model is the most appropriate choice for most meta-analyses.<sup>16</sup> Accordingly, a Dersimonian–Laird random-effect model will be used.<sup>17</sup> The heterogeneity of treatment effects between studies will be investigated statistically using the chi-square test and  $I^2$  statistic.  $I^2$  values of 25, 50, and 75% correspond to low, medium, and high levels of heterogeneity, respectively.<sup>18</sup> If heterogeneity exists and there are a substantial number of studies, subgroup analyses and meta-regressions will be undertaken. A sensitivity analysis will be performed to exclude low-quality trials. Funnel plots, Egger’s regression asymmetry test, and Begg’s test will be used to evaluate publication bias.<sup>14,19</sup> A two-sided P-value < 0.05 will be regarded as significant for all analyses. All analyses will be calculated using Stata software (ver. 12.0; StataCorp, College Station, TX, USA). When there are insufficient clinically

1  
2  
3  
4 homogeneous trials to perform a meta-analysis, we will present a narrative synthesis.  
5  
6

### 7 **Assessment of quality of evidence**

8  
9 An assessment of the quality of the evidence for the primary outcome will be made in  
10 accordance with the criteria suggested by the Grading of Recommendations  
11 Assessment, Development and Evaluation (GRADE) Workgroup.<sup>20</sup> The GRADE  
12 system rates the quality of evidence across studies as very low, low, moderate, or  
13 high.  
14  
15  
16  
17  
18

### 19 **Ethics and dissemination**

20  
21 No human subject participants will be involved in this study. On completion of the  
22 analysis, we will prepare a manuscript for publication in a peer-reviewed journal and  
23 present the results at a conference.  
24  
25  
26  
27  
28  
29  
30  
31  
32  
33  
34  
35  
36  
37  
38  
39  
40  
41  
42  
43  
44  
45  
46  
47  
48  
49  
50  
51  
52  
53  
54  
55  
56  
57  
58  
59  
60

## References

1. House AA, Ronco C. The burden of cardiovascular risk in chronic kidney disease and dialysis patients (cardiorenal syndrome type 4). *Contrib Nephrol* 2011;171:50-56.
2. Ravarotto V, Simioni F, Pagnin E, *et al.* Oxidative stress - chronic kidney disease - cardiovascular disease: A vicious circle. *Life Sci* 2018;210:125-131.
3. Longenecker JC, Coresh J, Powe NR, *et al.* Traditional cardiovascular disease risk factors in dialysis patients compared with the general population: the CHOICE Study. *J Am Soc Nephrol* 2002;13(7):1918-1927.
4. Matsuyama Y, Terawaki H, Terada T, *et al.* Albumin thiol oxidation and serum protein carbonyl formation are progressively enhanced with advancing stages of chronic kidney disease. *Clinical and experimental nephrology* 2009;13(4):308-315.
5. Jankowski J, Korzeniowska K, Cieslewicz A, *et al.* Coenzyme Q10 - A new player in the treatment of heart failure? *Pharmacological reports : PR* 2016;68(5):1015-1019.
6. Beyer RE. The participation of coenzyme Q in free radical production and antioxidation. *Free Radic Biol Med* 1990;8(6):545-565.
7. DiNicolantonio JJ, Bhutani J, McCarty MF, *et al.* Coenzyme Q10 for the treatment of heart failure: a review of the literature. *Open Heart* 2015;2(1):e000326.
8. Mehmetoglu I, Yerlikaya FH, Kurban S, *et al.* Oxidative stress markers in hemodialysis and peritoneal dialysis patients, including coenzyme Q10 and ischemia-modified albumin. *Int J Artif Organs* 2012;35(3):226-232.
9. Gazdikova K, Gvozdjakova A, Kucharska J, *et al.* Oxidative stress and plasma concentrations of coenzyme Q10, alpha-tocopherol, and beta-carotene in patients with a mild to moderate decrease of kidney function. *Nephron* 2001;88(3):285.
10. Rivara MB, Yeung CK, Robinson-Cohen C, *et al.* Effect of Coenzyme Q10 on Biomarkers of Oxidative Stress and Cardiac Function in Hemodialysis Patients: The CoQ10 Biomarker Trial. *Am J Kidney Dis* 2017;69(3):389-399.
11. Bakhshayeshkaram M, Lankarani KB, Mirhosseini N, *et al.* The effects of coenzyme Q10 supplementation on metabolic profiles of patients with chronic kidney disease: A systematic review and meta-analysis of randomized controlled trials. *Curr Pharm Des* 2018.
12. Shamseer L, Moher D, Clarke M, *et al.* Preferred reporting items for systematic review and meta-analysis protocols (PRISMA-P) 2015: elaboration and explanation. *BMJ (Clinical research ed)* 2015;350:g7647.
13. Higgins JP, Altman DG, Gotzsche PC, *et al.* The Cochrane Collaboration's tool for assessing risk of bias in randomised trials. *BMJ (Clinical research ed)* 2011;343:d5928.
14. Egger M, Davey Smith G, Schneider M, *et al.* Bias in meta-analysis detected by a simple, graphical test. *BMJ (Clinical research ed)* 1997;315(7109):629-634.
15. Friedrich JO, Adhikari NK, Beyene J. Inclusion of zero total event trials in meta-analyses maintains analytic consistency and incorporates all available data. *BMC medical research methodology* 2007;7:5.
16. Borenstein M, Hedges LV, Higgins JP, *et al.* A basic introduction to fixed-effect and random-effects models for meta-analysis. *Research synthesis methods* 2010;1(2):97-111.
17. DerSimonian R, Laird N. Meta-analysis in clinical trials. *Controlled clinical trials* 1986;7(3):177-188.

- 1  
2  
3 18.Higgins JP, Thompson SG, Deeks JJ, *et al.* Measuring inconsistency in meta-analyses. *BMJ*  
4 (*Clinical research ed*) 2003;327(7414):557-560.  
5  
6 19.Begg CB, Mazumdar M. Operating characteristics of a rank correlation test for publication bias.  
7 *Biometrics* 1994;50(4):1088-1101.  
8  
9 20.Guyatt GH, Oxman AD, Vist GE, *et al.* GRADE: an emerging consensus on rating quality of  
10 evidence and strength of recommendations. *BMJ (Clinical research ed)* 2008;336(7650):924-926.  
11  
12  
13  
14  
15  
16  
17  
18  
19  
20  
21  
22  
23  
24  
25  
26  
27  
28  
29  
30  
31  
32  
33  
34  
35  
36  
37  
38  
39  
40  
41  
42  
43  
44  
45  
46  
47  
48  
49  
50  
51  
52  
53  
54  
55  
56  
57  
58  
59  
60

The English in this document has been checked by at least two professional editors,  
both native speakers of English. For a certificate, please see:

<http://www.textcheck.com/certificate/CKDMf2>

Table 1 MEDLINE search terms

|                                   |                                                                                                                                                                                                                                                                                                                                                                                                                                                                                                                                                                                                                                                                                                                                  |
|-----------------------------------|----------------------------------------------------------------------------------------------------------------------------------------------------------------------------------------------------------------------------------------------------------------------------------------------------------------------------------------------------------------------------------------------------------------------------------------------------------------------------------------------------------------------------------------------------------------------------------------------------------------------------------------------------------------------------------------------------------------------------------|
| Search for coenzyme Q10           | 1 Ubiquinone/<br>(ubiquinon\$ or caomet or decorenone or mitocor or neuquinon\$ or ubidecarenone<br>2 or ubimaior or ubiquinol or ubiten).tw.<br>3 ((bioquinone or bio-quinone or coenzyme<br>4 or co-enzyme or quinone) adj (q\$ or<br>5 "910")).tw.<br>6 Ubiquinol-10.tw.<br>7 q 10.tw.<br>8 coq 10.tw.<br>9 (coq10 or q10).tw.<br>10 1 or 2 or 3 or 4 or 5 or 6 or 7                                                                                                                                                                                                                                                                                                                                                          |
| Search for chronic kidney disease | 9 Kidney Diseases/<br>10 exp Renal Replacement Therapy/<br>11 Renal Insufficiency/<br>12 exp Renal Insufficiency, Chronic/<br>13 dialysis.tw.<br>(hemodialysis or haemodialysis or<br>14 hemodiafiltration or haemodiafiltration or<br>15 hemofiltration or haemofiltration).tw.<br>16 (kidney disease* or renal disease* or<br>17 kidney failure or renal failure).tw.<br>18 (ESRF or ESKF or ESRD or ESKD).tw.<br>19 (CKF or CKD or CRF or CRD).tw.<br>20 (PD or CAPD or CCPD or APD).tw.<br>21 Diabetic Nephropathies/<br>22 diabetic nephropath\$.tw.<br>23 diabetic kidney disease\$.tw.<br>24 Uremia/<br>25 ur?emi\$.tw.<br>26 9 or 10 or 11 or 12 or 13 or 14 or 15 or 16<br>27 or 17 or 18 or 19 or 20 or 21 or 22 or 23 |
| Search for combinations           | 25 8 and 24                                                                                                                                                                                                                                                                                                                                                                                                                                                                                                                                                                                                                                                                                                                      |
| Excluding animal studies          | 26 exp animals/ not humans.sh.<br>27 25 not 26                                                                                                                                                                                                                                                                                                                                                                                                                                                                                                                                                                                                                                                                                   |

# BMJ Open

## Efficacy of coenzyme Q10 in patients with chronic kidney disease: Protocol for a systematic review

|                                 |                                                                                                                                                                                                                                                        |
|---------------------------------|--------------------------------------------------------------------------------------------------------------------------------------------------------------------------------------------------------------------------------------------------------|
| Journal:                        | <i>BMJ Open</i>                                                                                                                                                                                                                                        |
| Manuscript ID                   | bmjopen-2019-029053.R1                                                                                                                                                                                                                                 |
| Article Type:                   | Protocol                                                                                                                                                                                                                                               |
| Date Submitted by the Author:   | 17-Apr-2019                                                                                                                                                                                                                                            |
| Complete List of Authors:       | Xu, Yongxing; the 306th hospital of Chinese PLA,<br>Liu, Juan; the 306th hospital of Chinese PLA<br>Han, Enhong; the 306th hospital of Chinese PLA<br>Wang, Yan; the 306th hospital of Chinese PLA<br>Gao, jianjun; the 306th hospital of Chinese PLA, |
| <b>Primary Subject Heading</b>: | Pharmacology and therapeutics                                                                                                                                                                                                                          |
| Secondary Subject Heading:      | Medical management                                                                                                                                                                                                                                     |
| Keywords:                       | Coenzyme Q10, chronic kidney disease, cardiovascular, oxidative stress, inflammation, glucose metabolism                                                                                                                                               |
|                                 |                                                                                                                                                                                                                                                        |

SCHOLARONE™  
Manuscripts

1  
2  
3  
4 **Efficacy of coenzyme Q10 in patients with chronic kidney disease: protocol for a**  
5 **systematic review**  
6  
7  
8

9 Yongxing Xu, Juan Liu, Enhong Han, Yan wang, Jianjun Gao

10 Department of Nephrology, The 306<sup>th</sup> Hospital of Chinese PLA, Beijing, China  
11  
12  
13  
14  
15  
16  
17

18 Corresponding author's information:

19 Address: Jianjun Gao, Department of Nephrology, The 306<sup>th</sup> Hospital of Chinese PLA,  
20  
21 9 AnXiangBeiLi Road, Beijing 100101, PR China.  
22  
23

24 Tel: +86-10-66356929  
25

26 Fax: +86-10-68130297  
27

28 E-mail: [gao306kidney@126.com](mailto:gao306kidney@126.com)  
29  
30  
31  
32  
33  
34  
35  
36  
37  
38  
39  
40  
41  
42  
43  
44  
45  
46  
47  
48  
49  
50  
51  
52  
53  
54  
55  
56  
57  
58  
59  
60

## Abstract

**Introduction** Coenzyme Q10 (CoQ10) is a fat-soluble vitamin-like quinone that exerts antioxidative functions and is also an important factor in mitochondrial metabolism. Plasma concentrations of CoQ10 are depressed in patients with chronic kidney disease (CKD). A CoQ10 supplement can reduce adverse cardiovascular events, improve mitochondrial function, and decrease oxidative stress in patients with non-dialysis CKD and dialysis CKD. We performed this study as a systematic review to comprehensively assess the effect of a CoQ10 supplement on patients with CKD.

**Methods and analysis** The present systematic review protocol is reported in accordance with the Preferred Reporting Items for Systematic Reviews and Meta-analysis Protocols (PRISMA-P) guidelines. The MEDLINE, EMBASE, and Cochrane library databases will be searched without language restrictions. Two reviewers will independently screen the references in two stages: screening of the title/abstract and then of the full-text, to identify references meeting the inclusion criteria. A descriptive overview and tabular and/or graphical summaries will be generated, and directed content analysis will be carried out on the extracted data.

**Ethics and dissemination** This systematic review will evaluate the efficacy and safety of CoQ10 in patients with CKD. Ethical approval is not required for this study. The results of this systematic review will be presented in relevant conferences and published in a peer-review journal. PROSPERO registration number CRD42019120201

**Keywords:** Coenzyme Q10; chronic kidney disease; cardiovascular; oxidative stress; inflammation; glucose metabolism, lipid profiles



### Strengths and limitations of this study

- The first comprehensive systematic review of the effects of a CoQ10 supplement on cardiovascular, oxidative stress, inflammation, glucose metabolism, lipid profiles, all-cause mortality, safety and tolerability in patients with CKD.
- The methodological design is very strong and robust.
- Both patients with non-dialysis CKD and those undergoing dialysis are to be included.
- In cases where it is not possible to pool data through meta-analysis, we will present outcome data in a narrative way.

## Introduction

The mortality rate of patients with chronic kidney disease (CKD) increases with a decrease in the glomerular filtration rate. Cardiovascular diseases, such as coronary artery disease, congestive heart failure and sudden cardiac death, represent the leading cause of morbidity and mortality in patients with CKD, particularly those who have reached end-stage renal disease.<sup>1</sup> Diabetes, hypertension, and obesity are traditional risk factors for cardiovascular disease, which are all more prevalent in patients with CKD.<sup>2</sup> In addition to the traditional risk factors, oxidative stress is also a key contributor to the pathogenesis of atherosclerosis and other cardiovascular diseases in patients undergoing maintenance hemodialysis.<sup>3</sup> Oxidative stress originates from multiple sources, including decoupling of the electron transport chain in the mitochondria and inflammation-mediated production of superoxide via NADPH oxidase. Oxidative stress, inflammation, and endothelial dysfunction are detectable even at the very early stage of CKD.<sup>4</sup>

Coenzyme Q10 (CoQ10) is a fat-soluble vitamin-like quinone, also known as ubiquinone, that exerts antioxidative functions. CoQ10 transports electrons from complexes 1 or 2 to complex 3 in mitochondria.<sup>5</sup> CoQ10 treatment decreases superoxide production in endothelial cells and improves cardiac capacity in patients with heart failure.<sup>6</sup> Long-term therapy with CoQ10 can reduce major adverse cardiovascular events, and is safe and well-tolerated by the general population.<sup>7</sup> Plasma concentrations of CoQ10 are depressed in patients with non-dialysis CKD, and in those undergoing dialysis.<sup>8,9</sup> Depleting CoQ10 leads to inefficient electron transport and increased reactive oxygen species production. CoQ10 supplementation may improve mitochondrial function and decrease oxidative stress in patients undergoing hemodialysis.<sup>7,10</sup> CoQ10 may have potential for preventing and treating cardiovascular disease, improving cardiac function, and decreasing oxidative stress in patients with CKD. CoQ10 may have favorable effects on cardiac function, hypertension, glucose metabolism, lipid profiles, inflammation, and oxidative stress in patients with non-dialysis CKD and those undergoing dialysis, but the results remain

1  
2  
3  
4 controversial. One recent meta-analysis showed that CoQ10 supplementation  
5 significantly improves the metabolic profile of patients with CKD.<sup>11</sup> However, no  
6 published study has systematically and comprehensively summarized the effects of  
7 CoQ10 on cardiovascular outcomes, inflammation, oxidative stress, glucose  
8 metabolism, and lipid profiles.

9  
10  
11  
12  
13 The aim of this systematic review will be to systematically appraise the evidence  
14 regarding the effects of CoQ10 supplementation in patients with CKD.  
15  
16

## 17 18 19 **Methods**

### 20 21 **Protocol design and registration**

22  
23 This protocol is reported in accordance with the Preferred Reporting Items for  
24 Systematic Reviews and Meta-analyses Protocol (PRISMA-P) checklist  
25 (Supplementary File S1)<sup>12</sup>. To minimize reporting bias, this protocol was previously  
26 registered with the International Prospective Register of Systematic Reviews  
27 (PROSPERO), a platform for the international registration of prospective systematic  
28 reviews, and assigned the registration number CRD42019120201 (available at:  
29 [http://www.crd.york.ac.uk/PROSPERO/display\\_record.php?ID=CRD4201912021](http://www.crd.york.ac.uk/PROSPERO/display_record.php?ID=CRD4201912021)).  
30  
31  
32  
33  
34  
35

36 We started this study in December 2018 and anticipate to complete the study in  
37 August 2019.  
38  
39  
40  
41

42  
43 **Eligibility criteria** The included trials will meet the following criteria: (1)  
44 randomized-controlled, quasi-randomized, non-randomized trial, or observational  
45 study (S); (2) participants with CKD (P); (3) the intervention of interest was CoQ10  
46 treatment (I); (4) the comparator was adult patients with CKD who did not receive the  
47 intervention (C).  
48  
49  
50  
51  
52  
53

### 54 55 **Pre-specified outcomes**

56 The primary outcomes will be cardiovascular effects, including:

57  
58 1) Cardiac function and structure: left ventricular ejection fraction (determined by  
59  
60

1  
2  
3  
4 echocardiography or contrast or radionuclide angiography); diastolic heart function;  
5 cardiac structure (measured by individual trials);

6  
7 2) Biomarkers of cardiac function, such as brain natriuretic peptide and  
8 N-terminal-pro-b-type natriuretic peptide;

9  
10 3) Blood pressure and heart rate;

11  
12 4) Symptom improvement (measured by individual trials and/or by exercise capacity),  
13 quality of life (measured by individual trials);

14  
15 5) Major cardiovascular event (cardiovascular mortality, non-fatal myocardial  
16 infarction, non-fatal stroke, and re-vascularization procedures);

17  
18  
19  
20  
21  
22  
23 Secondary outcomes of interest include effects on oxidative stress, inflammation,  
24 glucose metabolism, lipid profiles, all-cause mortality, safety, and tolerability.

### 25 26 27 28 29 **Database and search strategy**

30  
31 Searches will be performed, with no date restrictions, of the MEDLINE via Ovid,  
32 EMBASE via Ovid, and Cochrane Library (Cochrane Central Register of Controlled  
33 Trials) electronic databases, using relevant text words and medical subject headings,  
34 as follows: kidney diseases, renal replacement therapy, renal insufficiency, dialysis,  
35 predialysis, diabetic nephropathies, ubiquinone, ubidecarenone, coenzyme Q10,  
36 co-enzyme Q10, and quinone. The clinicaltrials.gov website will be searched for  
37 relevant studies that have been registered and completed but remain to be published.  
38 The reference lists of articles and other reviews retrieved during the search or known  
39 to the authors will be searched for relevant articles. Elsewhere (Supplementary File  
40 S2), the full electronic search strategy for MEDLINE through Ovid is presented.  
41 There will be no language restrictions.  
42  
43  
44  
45  
46  
47  
48  
49  
50  
51  
52  
53

### 54 **Records and data management**

55  
56 All citations identified by our search strategy will be exported to EndNote X9, a  
57 bibliographic management software and duplicates removed. The screening of  
58  
59  
60

1  
2  
3  
4 remaining citations will be conducted by using Endnote X9, too. The data extraction  
5 will be performed on Microsoft Excel 2016.  
6  
7  
8

### 9 10 **Study selection and data extraction**

11 Two independent reviewers will assess the eligibility of the trials with a standardized  
12 approach. Discrepancies will be resolved by discussion with a third individual. Two  
13 authors will independently extract data, including baseline patient characteristics,  
14 follow-up duration, intervention, outcome events, and adverse events using a  
15 standardized data collection form. Any further information required from the original  
16 investigators will be requested by written correspondence, and any relevant  
17 information obtained in this manner will be included in the review.  
18  
19  
20  
21  
22  
23  
24  
25  
26

### 27 **Assessing the risk of bias**

28 Two authors will independently assess the risk of bias of the randomized controlled  
29 trials according to the standard criteria. Seven different bias domains, including  
30 random sequence generation (selection bias), allocation concealment (selection bias),  
31 blinding of participants and personnel (performance bias), blinding of outcome  
32 assessment (detection bias), incomplete outcome data (attrition bias), selective  
33 reporting (reporting bias), and any other potential biases will be categorized as low  
34 risk of bias, high risk of bias, or unclear risk of bias<sup>13</sup>. Observational studies will be  
35 evaluated with the Newcastle–Ottawa Scale<sup>14</sup>.  
36  
37  
38  
39  
40  
41  
42  
43  
44  
45  
46

### 47 **Statistical analysis**

48 A meta-analysis will be performed if sufficient data are available. The results of  
49 dichotomous outcomes will be expressed as risk ratios (RRs) or odds ratios (OR) with  
50 95% confidence intervals (CIs) for individual studies. For outcomes measured by  
51 continuous scales of measurement, the mean difference (MD) and 95% CI will be  
52 used. For trials with endpoints with zero events in the treatment arm, RRs will be  
53 calculated using a 0.5 cell correction.<sup>15</sup> There is no reason to assume that the effects  
54  
55  
56  
57  
58  
59  
60

1  
2  
3  
4 being estimated in the different studies will not be identical; therefore, the  
5 random-effect model is the most appropriate choice for most meta-analyses.<sup>16</sup>  
6 Accordingly, a Dersimonian–Laird random-effect model will be used.<sup>17</sup> The  
7 heterogeneity of treatment effects between studies will be investigated statistically  
8 using the chi-square test and I<sup>2</sup> statistic. I<sup>2</sup> values of 25, 50, and 75% correspond to  
9 low, medium, and high levels of heterogeneity, respectively.<sup>18</sup> If heterogeneity exists  
10 and there are a substantial number of studies, subgroup analyses and meta-regressions  
11 will be undertaken. A sensitivity analysis will be performed to exclude low-quality  
12 trials. Funnel plots, Egger’s regression asymmetry test, and Begg’s test will be used to  
13 evaluate publication bias.<sup>14,19</sup> A two-sided P-value < 0.05 will be regarded as  
14 significant for all analyses. All analyses will be calculated using Stata software (ver.  
15 12.0; StataCorp, College Station, TX, USA). When there are insufficient clinically  
16 homogeneous trials to perform a meta-analysis, we will present a narrative synthesis.  
17  
18  
19  
20  
21  
22  
23  
24  
25  
26  
27  
28  
29  
30

### 31 **Assessment of quality of evidence**

32 An assessment of the quality of the evidence for the primary outcome will be made in  
33 accordance with the criteria suggested by the Grading of Recommendations  
34 Assessment, Development and Evaluation (GRADE) Workgroup.<sup>20</sup> The GRADE  
35 system rates the quality of evidence across studies as very low, low, moderate, or  
36 high.  
37  
38  
39  
40  
41  
42  
43  
44

### 45 **Ethics and dissemination**

46 No human subject participants will be involved. On completion of the analysis, we  
47 will prepare a manuscript for publication in a peer-reviewed journal and present the  
48 results at conferences.  
49  
50  
51  
52  
53

### 54 **Discussion**

55 This protocol presents an explicit plan of a systematic review to identify and  
56 summarize studies reporting the effects of CoQ10 in CKD patients. To assess the  
57  
58  
59  
60

1  
2  
3  
4 quality of the evidence, the GRADE guidelines will be applied. In cases where it is  
5 not possible to pool data through meta-analysis, we will present outcome data in a  
6 narrative way, which will be a likely limitation. The existing evidence may be  
7 insufficient to make some robust conclusions; however, the results of this systematic  
8 review will provide important additional information relevant to the design of future  
9 trials.  
10  
11  
12  
13  
14

### 15 16 17 **Patient and public involvement**

18 Patients were not involved in the development of the research question, outcome  
19 measure and study design.  
20  
21  
22

23  
24  
25 **Contributors** YX Xu is the first author, JJ Gao is the corresponding author; YX Xu  
26 and JJ Gao designed the study; YX Xu, J Lu and EH Han will acquire data; YX Xu  
27 and JJ Gao will analyze and interpret data; YX Xu, J Lu, Y wang and JJ Gao drafted  
28 the initial and final manuscript; All authors approved the final version of the  
29 manuscript.  
30  
31  
32  
33  
34

35  
36  
37 **Funding** The authors have not declared a specific grant for this research from any  
38 funding agency in the public, commercial or not-for-profit sectors.  
39  
40  
41

42  
43 **Competing interests** None declared  
44  
45

46  
47 **Patient consent for publication** Not required  
48  
49  
50  
51  
52  
53  
54  
55  
56  
57  
58  
59  
60

## References

1. House AA, Ronco C. The burden of cardiovascular risk in chronic kidney disease and dialysis patients (cardiorenal syndrome type 4). *Contrib Nephrol* 2011;171:50-56.
2. Ravarotto V, Simioni F, Pagnin E, et al. Oxidative stress - chronic kidney disease - cardiovascular disease: A vicious circle. *Life Sci* 2018;210:125-131.
3. Longenecker JC, Coresh J, Powe NR, et al. Traditional cardiovascular disease risk factors in dialysis patients compared with the general population: the CHOICE Study. *J Am Soc Nephrol* 2002;13(7):1918-1927.
4. Matsuyama Y, Terawaki H, Terada T, et al. Albumin thiol oxidation and serum protein carbonyl formation are progressively enhanced with advancing stages of chronic kidney disease. *Clinical and experimental nephrology* 2009;13(4):308-315.
5. Jankowski J, Korzeniowska K, Cieslewicz A, et al. Coenzyme Q10 - A new player in the treatment of heart failure? *Pharmacological reports : PR* 2016;68(5):1015-1019.
6. Beyer RE. The participation of coenzyme Q in free radical production and antioxidation. *Free Radic Biol Med* 1990;8(6):545-565.
7. DiNicolantonio JJ, Bhutani J, McCarty MF, et al. Coenzyme Q10 for the treatment of heart failure: a review of the literature. *Open Heart* 2015;2(1):e000326.
8. Mehmetoglu I, Yerlikaya FH, Kurban S, et al. Oxidative stress markers in hemodialysis and peritoneal dialysis patients, including coenzyme Q10 and ischemia-modified albumin. *Int J Artif Organs* 2012;35(3):226-232.
9. Gazdikova K, Gvozdjakova A, Kucharska J, et al. Oxidative stress and plasma concentrations of coenzyme Q10, alpha-tocopherol, and beta-carotene in patients with a mild to moderate decrease of kidney function. *Nephron* 2001;88(3):285.
10. Rivara MB, Yeung CK, Robinson-Cohen C, et al. Effect of Coenzyme Q10 on Biomarkers of Oxidative Stress and Cardiac Function in Hemodialysis Patients: The CoQ10 Biomarker Trial. *Am J Kidney Dis* 2017;69(3):389-399.
11. Bakhshayeshkaram M, Lankarani KB, Mirhosseini N, et al. The effects of coenzyme Q10 supplementation on metabolic profiles of patients with chronic kidney disease: A systematic review and meta-analysis of randomized controlled trials. *Curr Pharm Des* 2018.
12. Shamseer L, Moher D, Clarke M, et al. Preferred reporting items for systematic review and meta-analysis protocols (PRISMA-P) 2015: elaboration and explanation. *BMJ (Clinical research ed)* 2015;350:g7647.
13. Higgins JP, Altman DG, Gotzsche PC, et al. The Cochrane Collaboration's tool for assessing risk of bias in randomised trials. *BMJ (Clinical research ed)* 2011;343:d5928.
14. Egger M, Davey Smith G, Schneider M, et al. Bias in meta-analysis detected by a simple, graphical test. *BMJ (Clinical research ed)* 1997;315(7109):629-634.
15. Friedrich JO, Adhikari NK, Beyene J. Inclusion of zero total event trials in meta-analyses maintains analytic consistency and incorporates all available data. *BMC medical research methodology* 2007;7:5.
16. Borenstein M, Hedges LV, Higgins JP, et al. A basic introduction to fixed-effect and random-effects models for meta-analysis. *Research synthesis methods* 2010;1(2):97-111.
17. DerSimonian R, Laird N. Meta-analysis in clinical trials. *Controlled clinical trials*



1  
2  
3 1986;7(3):177-188.

4 18.Higgins JP, Thompson SG, Deeks JJ, *et al.* Measuring inconsistency in meta-analyses. *BMJ*  
5 (*Clinical research ed*) 2003;327(7414):557-560.

6  
7 19.Begg CB, Mazumdar M. Operating characteristics of a rank correlation test for publication  
8 bias. *Biometrics* 1994;50(4):1088-1101.

9  
10 20.Guyatt GH, Oxman AD, Vist GE, *et al.* GRADE: an emerging consensus on rating quality of  
11 evidence and strength of recommendations. *BMJ (Clinical research ed)*  
12 2008;336(7650):924-926.  
13  
14  
15  
16  
17  
18  
19  
20  
21  
22  
23  
24  
25  
26  
27  
28  
29  
30  
31  
32  
33  
34  
35  
36  
37  
38  
39  
40  
41  
42  
43  
44  
45  
46  
47  
48  
49  
50  
51  
52  
53  
54  
55  
56  
57  
58  
59  
60

For peer review only

**PRISMA-P (Preferred Reporting Items for Systematic review and Meta-Analysis Protocols) 2015 checklist: recommended items to address in a systematic review protocol\***

| Section and topic                 | Item No | Checklist item                                                                                                                                                                                                                | (Page No.#)      |
|-----------------------------------|---------|-------------------------------------------------------------------------------------------------------------------------------------------------------------------------------------------------------------------------------|------------------|
| <b>ADMINISTRATIVE INFORMATION</b> |         |                                                                                                                                                                                                                               |                  |
| Title:                            |         |                                                                                                                                                                                                                               |                  |
| Identification                    | 1a      | Identify the report as a protocol of a systematic review                                                                                                                                                                      | 1                |
| Update                            | 1b      | If the protocol is for an update of a previous systematic review, identify as such                                                                                                                                            | 1                |
| Registration                      | 2       | If registered, provide the name of the registry (such as PROSPERO) and registration number                                                                                                                                    | 2                |
| Authors:                          |         |                                                                                                                                                                                                                               |                  |
| Contact                           | 3a      | Provide name, institutional affiliation, e-mail address of all protocol authors; provide physical mailing address of corresponding author                                                                                     | 1                |
| Contributions                     | 3b      | Describe contributions of protocol authors and identify the guarantor of the review                                                                                                                                           | 9                |
| Amendments                        | 4       | If the protocol represents an amendment of a previously completed or published protocol, identify as such and list changes; otherwise, state plan for documenting important protocol amendments                               | 2                |
| Support:                          |         |                                                                                                                                                                                                                               |                  |
| Sources                           | 5a      | Indicate sources of financial or other support for the review                                                                                                                                                                 | None             |
| Sponsor                           | 5b      | Provide name for the review funder and/or sponsor                                                                                                                                                                             |                  |
| Role of sponsor or funder         | 5c      | Describe roles of funder(s), sponsor(s), and/or institution(s), if any, in developing the protocol                                                                                                                            |                  |
| <b>INTRODUCTION</b>               |         |                                                                                                                                                                                                                               |                  |
| Rationale                         | 6       | Describe the rationale for the review in the context of what is already known                                                                                                                                                 | 3                |
| Objectives                        | 7       | Provide an explicit statement of the question(s) the review will address with reference to participants, interventions, comparators, and outcomes (PICO)                                                                      | 5                |
| <b>METHODS</b>                    |         |                                                                                                                                                                                                                               |                  |
| Eligibility criteria              | 8       | Specify the study characteristics (such as PICO, study design, setting, time frame) and report characteristics (such as years considered, language, publication status) to be used as criteria for eligibility for the review | 5                |
| Information sources               | 9       | Describe all intended information sources (such as electronic databases, contact with study authors, trial registers or other grey literature sources) with planned dates of coverage                                         | 6                |
| Search strategy                   | 10      | Present draft of search strategy to be used for at least one electronic database, including planned limits, such that it could be repeated                                                                                    | 6 and Appendix-A |

|                                    |     |                                                                                                                                                                                                                                                     |     |
|------------------------------------|-----|-----------------------------------------------------------------------------------------------------------------------------------------------------------------------------------------------------------------------------------------------------|-----|
| Study records:                     |     |                                                                                                                                                                                                                                                     |     |
| Data management                    | 11a | Describe the mechanism(s) that will be used to manage records and data throughout the review                                                                                                                                                        | 6-7 |
| Selection process                  | 11b | State the process that will be used for selecting studies (such as two independent reviewers) through each phase of the review (that is, screening, eligibility and inclusion in meta-analysis)                                                     | 7   |
| Data collection process            | 11c | Describe planned method of extracting data from reports (such as piloting forms, done independently, in duplicate), any processes for obtaining and confirming data from investigators                                                              | 7   |
| Data items                         | 12  | List and define all variables for which data will be sought (such as PICO items, funding sources), any pre-planned data assumptions and simplifications                                                                                             | 7   |
| Outcomes and prioritization        | 13  | List and define all outcomes for which data will be sought, including prioritization of main and additional outcomes, with rationale                                                                                                                | 5-6 |
| Risk of bias in individual studies | 14  | Describe anticipated methods for assessing risk of bias of individual studies, including whether this will be done at the outcome or study level, or both; state how this information will be used in data synthesis                                | 7   |
| Data synthesis                     | 15a | Describe criteria under which study data will be quantitatively synthesised                                                                                                                                                                         | 7-8 |
|                                    | 15b | If data are appropriate for quantitative synthesis, describe planned summary measures, methods of handling data and methods of combining data from studies, including any planned exploration of consistency (such as I <sup>2</sup> , Kendall's τ) |     |
|                                    | 15c | Describe any proposed additional analyses (such as sensitivity or subgroup analyses, meta-regression)                                                                                                                                               |     |
|                                    | 15d | If quantitative synthesis is not appropriate, describe the type of summary planned                                                                                                                                                                  |     |
| Meta-bias(es)                      | 16  | Specify any planned assessment of meta-bias(es) (such as publication bias across studies, selective reporting within studies)                                                                                                                       | 7   |
| Confidence in cumulative evidence  | 17  | Describe how the strength of the body of evidence will be assessed (such as GRADE)                                                                                                                                                                  | 8   |

**\* It is strongly recommended that this checklist be read in conjunction with the PRISMA-P Explanation and Elaboration (cite when available) for important clarification on the items. Amendments to a review protocol should be tracked and dated. The copyright for PRISMA-P (including checklist) is held by the PRISMA-P Group and is distributed under a Creative Commons Attribution Licence 4.0.**

*From: Shamseer L, Moher D, Clarke M, Ghersi D, Liberati A, Petticrew M, Shekelle P, Stewart L, PRISMA-P Group. Preferred reporting items for systematic review and meta-analysis protocols (PRISMA-P) 2015: elaboration and explanation. BMJ. 2015 Jan 2;349(jan02 1):g7647.*

## Supplementary file S2

---

|                                   |                                                                                                                                                                                                                                                                                                                                                                                                                                                                                                                                                                                                                                                                                                                                      |
|-----------------------------------|--------------------------------------------------------------------------------------------------------------------------------------------------------------------------------------------------------------------------------------------------------------------------------------------------------------------------------------------------------------------------------------------------------------------------------------------------------------------------------------------------------------------------------------------------------------------------------------------------------------------------------------------------------------------------------------------------------------------------------------|
| Search for coenzyme Q10           | 1 Ubiquinone/<br>(ubiquinon\$ or caomet or decorenone or<br>mitocor or neuquinon\$ or ubidecarenone<br>2 or ubimaior or ubiquinol or ubiten).tw.<br>3 ((bioquinone or bio-quinone or coenzyme<br>4 or co-enzyme or quinone) adj (q\$ or<br>5 "910"))).tw.<br>6 Ubiquinol-10.tw.<br>7 q 10.tw.<br>8 coq 10.tw.<br>9 (coq10 or q10).tw.<br>10 1 or 2 or 3 or 4 or 5 or 6 or 7                                                                                                                                                                                                                                                                                                                                                          |
| Search for chronic kidney disease | 11 Kidney Diseases/<br>12 exp Renal Replacement Therapy/<br>13 Renal Insufficiency/<br>14 exp Renal Insufficiency, Chronic/<br>15 dialysis.tw.<br>16 (hemodialysis or haemodialysis or<br>17 hemodiafiltration or haemodiafiltration or<br>18 hemofiltration or haemofiltration).tw.<br>19 (kidney disease* or renal disease* or<br>20 kidney failure or renal failure).tw.<br>21 (ESRF or ESKF or ESRD or ESKD).tw.<br>22 (CKF or CKD or CRF or CRD).tw.<br>23 (PD or CAPD or CCPD or APD).tw.<br>24 Diabetic Nephropathies/<br>25 diabetic nephropath\$.tw.<br>26 diabetic kidney disease\$.tw.<br>27 Uremia/<br>28 ur?emi\$.tw.<br>29 9 or 10 or 11 or 12 or 13 or 14 or 15 or 16<br>30 or 17 or 18 or 19 or 20 or 21 or 22 or 23 |
| Search for combinations           | 31 8 and 24                                                                                                                                                                                                                                                                                                                                                                                                                                                                                                                                                                                                                                                                                                                          |
| Excluding animal studies          | 32 exp animals/ not humans.sh.<br>33 25 not 26                                                                                                                                                                                                                                                                                                                                                                                                                                                                                                                                                                                                                                                                                       |

---

# BMJ Open

## Efficacy of coenzyme Q10 in patients with chronic kidney disease: protocol for a systematic review

|                                 |                                                                                                                                                                                                                                                        |
|---------------------------------|--------------------------------------------------------------------------------------------------------------------------------------------------------------------------------------------------------------------------------------------------------|
| Journal:                        | <i>BMJ Open</i>                                                                                                                                                                                                                                        |
| Manuscript ID                   | bmjopen-2019-029053.R2                                                                                                                                                                                                                                 |
| Article Type:                   | Protocol                                                                                                                                                                                                                                               |
| Date Submitted by the Author:   | 19-Apr-2019                                                                                                                                                                                                                                            |
| Complete List of Authors:       | Xu, Yongxing; the 306th hospital of Chinese PLA,<br>Liu, Juan; the 306th hospital of Chinese PLA<br>Han, Enhong; the 306th hospital of Chinese PLA<br>Wang, Yan; the 306th hospital of Chinese PLA<br>Gao, Jianjun; the 306th hospital of Chinese PLA, |
| <b>Primary Subject Heading</b>: | Pharmacology and therapeutics                                                                                                                                                                                                                          |
| Secondary Subject Heading:      | Medical management                                                                                                                                                                                                                                     |
| Keywords:                       | Coenzyme Q10, chronic kidney disease, cardiovascular, oxidative stress, inflammation, glucose metabolism                                                                                                                                               |
|                                 |                                                                                                                                                                                                                                                        |

SCHOLARONE™  
Manuscripts

1  
2  
3  
4 **Efficacy of coenzyme Q10 in patients with chronic kidney disease: protocol for a**  
5 **systematic review**  
6  
7  
8

9 Yongxing Xu, Juan Liu, Enhong Han, Yan wang, Jianjun Gao

10 Department of Nephrology, The 306<sup>th</sup> Hospital of Chinese PLA, Beijing, China  
11  
12  
13  
14  
15  
16  
17

18 Corresponding author's information:

19 Address: Jianjun Gao, Department of Nephrology, The 306<sup>th</sup> Hospital of Chinese PLA,  
20  
21 9 AnXiangBeiLi Road, Beijing 100101, PR China.  
22  
23

24 Tel: +86-10-66356929  
25

26 Fax: +86-10-68130297  
27

28 E-mail: [gao306kidney@126.com](mailto:gao306kidney@126.com)  
29  
30  
31  
32  
33  
34  
35  
36  
37  
38  
39  
40  
41  
42  
43  
44  
45  
46  
47  
48  
49  
50  
51  
52  
53  
54  
55  
56  
57  
58  
59  
60

## Abstract

**Introduction** Coenzyme Q10 (CoQ10) is a fat-soluble vitamin-like quinone that exerts antioxidative functions and is also an important factor in mitochondrial metabolism. Plasma concentrations of CoQ10 are depressed in patients with chronic kidney disease (CKD). A CoQ10 supplement can reduce adverse cardiovascular events, improve mitochondrial function, and decrease oxidative stress in patients with non-dialysis CKD and dialysis CKD. We performed this study as a systematic review to comprehensively assess the effect of a CoQ10 supplement on patients with CKD.

**Methods and analysis** The present systematic review protocol is reported in accordance with the Preferred Reporting Items for Systematic Reviews and Meta-analysis Protocols (PRISMA-P) guidelines. The MEDLINE, EMBASE, and Cochrane library databases will be searched without language restrictions in December 2018. Two reviewers will independently screen the references in two stages: screening of the title/abstract and then of the full-text, to identify references meeting the inclusion criteria. A descriptive overview and tabular and/or graphical summaries will be generated, and directed content analysis will be carried out on the extracted data.

**Ethics and dissemination** This systematic review will evaluate the efficacy and safety of CoQ10 in patients with CKD. Ethical approval is not required for this study. The results of this systematic review will be presented in relevant conferences and published in a peer-review journal. PROSPERO registration number CRD42019120201

**Keywords:** Coenzyme Q10; chronic kidney disease; cardiovascular; oxidative stress; inflammation; glucose metabolism, lipid profiles

### Strengths and limitations of this study

- The systematic review is noncommercial and will comprehensively summarize the effects of a CoQ10 supplement on cardiovascular, oxidative stress, inflammation, glucose metabolism, lipid profiles in patients with CKD.
- The present systematic review protocol is reported in accordance with the Preferred Reporting Items for Systematic Reviews and Meta-Analyses Protocols (PRISMA-P) guidelines.
- Our review benefits from a sensitive search strategy including key terms, synonyms and medical subject headings.
- Both patients with non-dialysis CKD and those undergoing dialysis are to be included.
- In cases where it is not possible to pool data through meta-analysis, we will present outcome data in a narrative way, which will be a likely limitation.



## Introduction

The mortality rate of patients with chronic kidney disease (CKD) increases with a decrease in the glomerular filtration rate. Cardiovascular diseases, such as coronary artery disease, congestive heart failure and sudden cardiac death, represent the leading cause of morbidity and mortality in patients with CKD, particularly those who have reached end-stage renal disease.<sup>1</sup> Diabetes, hypertension, and obesity are traditional risk factors for cardiovascular disease, which are all more prevalent in patients with CKD.<sup>2</sup> In addition to the traditional risk factors, oxidative stress is also a key contributor to the pathogenesis of atherosclerosis and other cardiovascular diseases in patients undergoing maintenance hemodialysis.<sup>3</sup> Oxidative stress originates from multiple sources, including decoupling of the electron transport chain in the mitochondria and inflammation-mediated production of superoxide via NADPH oxidase. Oxidative stress, inflammation, and endothelial dysfunction are detectable even at the very early stage of CKD.<sup>4</sup>

Coenzyme Q10 (CoQ10) is a fat-soluble vitamin-like quinone, also known as ubiquinone, that exerts antioxidative functions. CoQ10 transports electrons from complexes 1 or 2 to complex 3 in mitochondria.<sup>5</sup> CoQ10 treatment decreases superoxide production in endothelial cells and improves cardiac capacity in patients with heart failure.<sup>6</sup> Long-term therapy with CoQ10 can reduce major adverse cardiovascular events, and is safe and well-tolerated by the general population.<sup>7</sup> Plasma concentrations of CoQ10 are depressed in patients with non-dialysis CKD, and in those undergoing dialysis.<sup>8,9</sup> Depleting CoQ10 leads to inefficient electron transport and increased reactive oxygen species production. CoQ10 supplementation may improve mitochondrial function and decrease oxidative stress in patients undergoing hemodialysis.<sup>7,10</sup> CoQ10 may have potential for preventing and treating cardiovascular disease, improving cardiac function, and decreasing oxidative stress in patients with CKD. CoQ10 may have favorable effects on cardiac function, hypertension, glucose metabolism, lipid profiles, inflammation, and oxidative stress in patients with non-dialysis CKD and those undergoing dialysis, but the results remain

1  
2  
3  
4 controversial. One recent meta-analysis showed that CoQ10 supplementation  
5 significantly improves the metabolic profile of patients with CKD.<sup>11</sup> However, no  
6 published study has systematically and comprehensively summarized the effects of  
7 CoQ10 on cardiovascular outcomes, inflammation, oxidative stress, glucose  
8 metabolism, and lipid profiles.

9  
10  
11  
12  
13 The aim of this systematic review will be to systematically appraise the evidence  
14 regarding the effects of CoQ10 supplementation in patients with CKD.  
15  
16

## 17 18 19 **Methods**

### 20 21 **Protocol design and registration**

22  
23 This protocol is reported in accordance with the Preferred Reporting Items for  
24 Systematic Reviews and Meta-analyses Protocol (PRISMA-P) checklist  
25 (Supplementary File S1)<sup>12</sup>. To minimize reporting bias, this protocol was previously  
26 registered with the International Prospective Register of Systematic Reviews  
27 (PROSPERO), a platform for the international registration of prospective systematic  
28 reviews, and assigned the registration number CRD42019120201 (available at:  
29 [http://www.crd.york.ac.uk/PROSPERO/display\\_record.php?ID=CRD4201912021](http://www.crd.york.ac.uk/PROSPERO/display_record.php?ID=CRD4201912021)).  
30  
31  
32

33 We started this study in December 2018 and anticipate to complete the study in  
34 August 2019.  
35  
36  
37  
38  
39  
40  
41

42 **Eligibility criteria** The included trials will meet the following criteria: (1)  
43 randomized-controlled, quasi-randomized, non-randomized trial, or observational  
44 study (S); (2) participants with CKD (P); (3) the intervention of interest was CoQ10  
45 treatment (I); (4) the comparator was adult patients with CKD who did not receive the  
46 intervention (C).  
47  
48  
49  
50  
51  
52  
53

### 54 55 **Pre-specified outcomes**

56 The primary outcomes will be cardiovascular effects, including:

57  
58 1) Cardiac function and structure: left ventricular ejection fraction (determined by  
59  
60

1  
2  
3  
4 echocardiography or contrast or radionuclide angiography); diastolic heart function;  
5 cardiac structure (measured by individual trials);

6  
7 2) Biomarkers of cardiac function, such as brain natriuretic peptide and  
8 N-terminal-pro-b-type natriuretic peptide;

9  
10 3) Blood pressure and heart rate;

11  
12 4) Symptom improvement (measured by individual trials and/or by exercise capacity),  
13 quality of life (measured by individual trials);

14  
15 5) Major cardiovascular event (cardiovascular mortality, non-fatal myocardial  
16 infarction, non-fatal stroke, and re-vascularization procedures);

17  
18  
19  
20  
21  
22  
23 Secondary outcomes of interest include effects on oxidative stress, inflammation,  
24 glucose metabolism, lipid profiles, all-cause mortality, safety, and tolerability.

### 25 26 27 28 29 **Database and search strategy**

30  
31 Searches will be performed, with no date restrictions, of the MEDLINE via Ovid,  
32 EMBASE via Ovid, and Cochrane Library (Cochrane Central Register of Controlled  
33 Trials) electronic databases, using relevant text words and medical subject headings,  
34 as follows: kidney diseases, renal replacement therapy, renal insufficiency, dialysis,  
35 predialysis, diabetic nephropathies, ubiquinone, ubidecarenone, coenzyme Q10,  
36 co-enzyme Q10, and quinone. The clinicaltrials.gov website will be searched for  
37 relevant studies that have been registered and completed but remain to be published.  
38 The reference lists of articles and other reviews retrieved during the search or known  
39 to the authors will be searched for relevant articles. Elsewhere (Supplementary File  
40 S2), the full electronic search strategy for MEDLINE through Ovid is presented.  
41 There will be no language restrictions.  
42  
43  
44  
45  
46  
47  
48  
49  
50  
51  
52  
53

### 54 **Records and data management**

55  
56 All citations identified by our search strategy will be exported to EndNote X9, a  
57 bibliographic management software and duplicates removed. The screening of  
58  
59  
60

1  
2  
3  
4 remaining citations will be conducted by using Endnote X9, too. The data extraction  
5 will be performed on Microsoft Excel 2016.  
6  
7  
8

### 9 10 **Study selection and data extraction**

11 Two independent reviewers will assess the eligibility of the trials with a standardized  
12 approach. Discrepancies will be resolved by discussion with a third individual. Two  
13 authors will independently extract data, including baseline patient characteristics,  
14 follow-up duration, intervention, outcome events, and adverse events using a  
15 standardized data collection form. Any further information required from the original  
16 investigators will be requested by written correspondence, and any relevant  
17 information obtained in this manner will be included in the review.  
18  
19  
20  
21  
22  
23  
24  
25  
26

### 27 **Assessing the risk of bias**

28 Two authors will independently assess the risk of bias of the randomized controlled  
29 trials according to the standard criteria. Seven different bias domains, including  
30 random sequence generation (selection bias), allocation concealment (selection bias),  
31 blinding of participants and personnel (performance bias), blinding of outcome  
32 assessment (detection bias), incomplete outcome data (attrition bias), selective  
33 reporting (reporting bias), and any other potential biases will be categorized as low  
34 risk of bias, high risk of bias, or unclear risk of bias<sup>13</sup>. Observational studies will be  
35 evaluated with the Newcastle–Ottawa Scale<sup>14</sup>.  
36  
37  
38  
39  
40  
41  
42  
43  
44  
45  
46

### 47 **Statistical analysis**

48 A meta-analysis will be performed if sufficient data are available. The results of  
49 dichotomous outcomes will be expressed as risk ratios (RRs) or odds ratios (OR) with  
50 95% confidence intervals (CIs) for individual studies. For outcomes measured by  
51 continuous scales of measurement, the mean difference (MD) and 95% CI will be  
52 used. For trials with endpoints with zero events in the treatment arm, RRs will be  
53 calculated using a 0.5 cell correction.<sup>15</sup> There is no reason to assume that the effects  
54  
55  
56  
57  
58  
59  
60

1  
2  
3  
4 being estimated in the different studies will not be identical; therefore, the  
5 random-effect model is the most appropriate choice for most meta-analyses.<sup>16</sup>  
6 Accordingly, a Dersimonian–Laird random-effect model will be used.<sup>17</sup> The  
7 heterogeneity of treatment effects between studies will be investigated statistically  
8 using the chi-square test and  $I^2$  statistic.  $I^2$  values of 25, 50, and 75% correspond to  
9 low, medium, and high levels of heterogeneity, respectively.<sup>18</sup> If heterogeneity exists  
10 and there are a substantial number of studies, subgroup analyses and meta-regressions  
11 will be undertaken. A sensitivity analysis will be performed to exclude low-quality  
12 trials. Funnel plots, Egger’s regression asymmetry test, and Begg’s test will be used to  
13 evaluate publication bias.<sup>14,19</sup> A two-sided P-value < 0.05 will be regarded as  
14 significant for all analyses. All analyses will be calculated using Stata software (ver.  
15 12.0; StataCorp, College Station, TX, USA). When there are insufficient clinically  
16 homogeneous trials to perform a meta-analysis, we will present a narrative synthesis.  
17  
18  
19  
20  
21  
22  
23  
24  
25  
26  
27  
28  
29  
30

### 31 **Assessment of quality of evidence**

32 An assessment of the quality of the evidence for the primary outcome will be made in  
33 accordance with the criteria suggested by the Grading of Recommendations  
34 Assessment, Development and Evaluation (GRADE) Workgroup.<sup>20</sup> The GRADE  
35 system rates the quality of evidence across studies as very low, low, moderate, or  
36 high.  
37  
38  
39  
40  
41  
42  
43  
44

### 45 **Ethics and dissemination**

46 No human subject participants will be involved. On completion of the analysis, we  
47 will prepare a manuscript for publication in a peer-reviewed journal and present the  
48 results at conferences.  
49  
50  
51  
52  
53

### 54 **Discussion**

55 This protocol presents an explicit plan of a systematic review to identify and  
56 summarize studies reporting the effects of CoQ10 in CKD patients. To assess the  
57  
58  
59  
60

1  
2  
3  
4 quality of the evidence, the GRADE guidelines will be applied. In cases where it is  
5 not possible to pool data through meta-analysis, we will present outcome data in a  
6 narrative way, which will be a likely limitation. The existing evidence may be  
7 insufficient to make some robust conclusions; however, the results of this systematic  
8 review will provide important additional information relevant to the design of future  
9 trials.  
10  
11  
12  
13  
14

### 15 16 17 **Patient and public involvement**

18 Patients were not involved in the development of the research question, outcome  
19 measure and study design.  
20  
21  
22

23  
24  
25 **Contributors** YX Xu is the first author, JJ Gao is the corresponding author; YX Xu  
26 and JJ Gao designed the study; YX Xu, J Lu and EH Han will acquire data; YX Xu  
27 and JJ Gao will analyze and interpret data; YX Xu, J Lu, Y wang and JJ Gao drafted  
28 the initial and final manuscript; All authors approved the final version of the  
29 manuscript.  
30  
31  
32  
33  
34

35  
36  
37 **Funding** The authors have not declared a specific grant for this research from any  
38 funding agency in the public, commercial or not-for-profit sectors.  
39  
40  
41

42  
43 **Competing interests** None declared  
44  
45

46  
47 **Patient consent for publication** Not required  
48  
49  
50  
51  
52  
53  
54  
55  
56  
57  
58  
59  
60

## References

1. House AA, Ronco C. The burden of cardiovascular risk in chronic kidney disease and dialysis patients (cardiorenal syndrome type 4). *Contrib Nephrol* 2011;171:50-56.
2. Ravarotto V, Simioni F, Pagnin E, et al. Oxidative stress - chronic kidney disease - cardiovascular disease: A vicious circle. *Life Sci* 2018;210:125-131.
3. Longenecker JC, Coresh J, Powe NR, et al. Traditional cardiovascular disease risk factors in dialysis patients compared with the general population: the CHOICE Study. *J Am Soc Nephrol* 2002;13(7):1918-1927.
4. Matsuyama Y, Terawaki H, Terada T, et al. Albumin thiol oxidation and serum protein carbonyl formation are progressively enhanced with advancing stages of chronic kidney disease. *Clinical and experimental nephrology* 2009;13(4):308-315.
5. Jankowski J, Korzeniowska K, Cieslewicz A, et al. Coenzyme Q10 - A new player in the treatment of heart failure? *Pharmacological reports : PR* 2016;68(5):1015-1019.
6. Beyer RE. The participation of coenzyme Q in free radical production and antioxidation. *Free Radic Biol Med* 1990;8(6):545-565.
7. DiNicolantonio JJ, Bhutani J, McCarty MF, et al. Coenzyme Q10 for the treatment of heart failure: a review of the literature. *Open Heart* 2015;2(1):e000326.
8. Mehmetoglu I, Yerlikaya FH, Kurban S, et al. Oxidative stress markers in hemodialysis and peritoneal dialysis patients, including coenzyme Q10 and ischemia-modified albumin. *Int J Artif Organs* 2012;35(3):226-232.
9. Gazdikova K, Gvozdjakova A, Kucharska J, et al. Oxidative stress and plasma concentrations of coenzyme Q10, alpha-tocopherol, and beta-carotene in patients with a mild to moderate decrease of kidney function. *Nephron* 2001;88(3):285.
10. Rivara MB, Yeung CK, Robinson-Cohen C, et al. Effect of Coenzyme Q10 on Biomarkers of Oxidative Stress and Cardiac Function in Hemodialysis Patients: The CoQ10 Biomarker Trial. *Am J Kidney Dis* 2017;69(3):389-399.
11. Bakhshayeshkaram M, Lankarani KB, Mirhosseini N, et al. The effects of coenzyme Q10 supplementation on metabolic profiles of patients with chronic kidney disease: A systematic review and meta-analysis of randomized controlled trials. *Curr Pharm Des* 2018.
12. Shamseer L, Moher D, Clarke M, et al. Preferred reporting items for systematic review and meta-analysis protocols (PRISMA-P) 2015: elaboration and explanation. *BMJ (Clinical research ed)* 2015;350:g7647.
13. Higgins JP, Altman DG, Gotzsche PC, et al. The Cochrane Collaboration's tool for assessing risk of bias in randomised trials. *BMJ (Clinical research ed)* 2011;343:d5928.
14. Egger M, Davey Smith G, Schneider M, et al. Bias in meta-analysis detected by a simple, graphical test. *BMJ (Clinical research ed)* 1997;315(7109):629-634.
15. Friedrich JO, Adhikari NK, Beyene J. Inclusion of zero total event trials in meta-analyses maintains analytic consistency and incorporates all available data. *BMC medical research methodology* 2007;7:5.
16. Borenstein M, Hedges LV, Higgins JP, et al. A basic introduction to fixed-effect and random-effects models for meta-analysis. *Research synthesis methods* 2010;1(2):97-111.
17. DerSimonian R, Laird N. Meta-analysis in clinical trials. *Controlled clinical trials*

1  
2  
3 1986;7(3):177-188.

4 18.Higgins JP, Thompson SG, Deeks JJ, *et al.* Measuring inconsistency in meta-analyses. *BMJ*  
5 (*Clinical research ed*) 2003;327(7414):557-560.

6  
7 19.Begg CB, Mazumdar M. Operating characteristics of a rank correlation test for publication  
8 bias. *Biometrics* 1994;50(4):1088-1101.

9  
10 20.Guyatt GH, Oxman AD, Vist GE, *et al.* GRADE: an emerging consensus on rating quality of  
11 evidence and strength of recommendations. *BMJ (Clinical research ed)*  
12 2008;336(7650):924-926.  
13  
14  
15  
16  
17  
18  
19  
20  
21  
22  
23  
24  
25  
26  
27  
28  
29  
30  
31  
32  
33  
34  
35  
36  
37  
38  
39  
40  
41  
42  
43  
44  
45  
46  
47  
48  
49  
50  
51  
52  
53  
54  
55  
56  
57  
58  
59  
60

For peer review only



**PRISMA-P (Preferred Reporting Items for Systematic review and Meta-Analysis Protocols) 2015 checklist: recommended items to address in a systematic review protocol\***

| Section and topic                 | Item No | Checklist item                                                                                                                                                                                                                | (Page No.#)      |
|-----------------------------------|---------|-------------------------------------------------------------------------------------------------------------------------------------------------------------------------------------------------------------------------------|------------------|
| <b>ADMINISTRATIVE INFORMATION</b> |         |                                                                                                                                                                                                                               |                  |
| Title:                            |         |                                                                                                                                                                                                                               |                  |
| Identification                    | 1a      | Identify the report as a protocol of a systematic review                                                                                                                                                                      | 1                |
| Update                            | 1b      | If the protocol is for an update of a previous systematic review, identify as such                                                                                                                                            | 1                |
| Registration                      | 2       | If registered, provide the name of the registry (such as PROSPERO) and registration number                                                                                                                                    | 2                |
| Authors:                          |         |                                                                                                                                                                                                                               |                  |
| Contact                           | 3a      | Provide name, institutional affiliation, e-mail address of all protocol authors; provide physical mailing address of corresponding author                                                                                     | 1                |
| Contributions                     | 3b      | Describe contributions of protocol authors and identify the guarantor of the review                                                                                                                                           | 9                |
| Amendments                        | 4       | If the protocol represents an amendment of a previously completed or published protocol, identify as such and list changes; otherwise, state plan for documenting important protocol amendments                               | 2                |
| Support:                          |         |                                                                                                                                                                                                                               |                  |
| Sources                           | 5a      | Indicate sources of financial or other support for the review                                                                                                                                                                 | None             |
| Sponsor                           | 5b      | Provide name for the review funder and/or sponsor                                                                                                                                                                             |                  |
| Role of sponsor or funder         | 5c      | Describe roles of funder(s), sponsor(s), and/or institution(s), if any, in developing the protocol                                                                                                                            |                  |
| <b>INTRODUCTION</b>               |         |                                                                                                                                                                                                                               |                  |
| Rationale                         | 6       | Describe the rationale for the review in the context of what is already known                                                                                                                                                 | 3                |
| Objectives                        | 7       | Provide an explicit statement of the question(s) the review will address with reference to participants, interventions, comparators, and outcomes (PICO)                                                                      | 5                |
| <b>METHODS</b>                    |         |                                                                                                                                                                                                                               |                  |
| Eligibility criteria              | 8       | Specify the study characteristics (such as PICO, study design, setting, time frame) and report characteristics (such as years considered, language, publication status) to be used as criteria for eligibility for the review | 5                |
| Information sources               | 9       | Describe all intended information sources (such as electronic databases, contact with study authors, trial registers or other grey literature sources) with planned dates of coverage                                         | 6                |
| Search strategy                   | 10      | Present draft of search strategy to be used for at least one electronic database, including planned limits, such that it could be repeated                                                                                    | 6 and Appendix-A |

|                                    |     |                                                                                                                                                                                                                                                     |     |
|------------------------------------|-----|-----------------------------------------------------------------------------------------------------------------------------------------------------------------------------------------------------------------------------------------------------|-----|
| Study records:                     |     |                                                                                                                                                                                                                                                     |     |
| Data management                    | 11a | Describe the mechanism(s) that will be used to manage records and data throughout the review                                                                                                                                                        | 6-7 |
| Selection process                  | 11b | State the process that will be used for selecting studies (such as two independent reviewers) through each phase of the review (that is, screening, eligibility and inclusion in meta-analysis)                                                     | 7   |
| Data collection process            | 11c | Describe planned method of extracting data from reports (such as piloting forms, done independently, in duplicate), any processes for obtaining and confirming data from investigators                                                              | 7   |
| Data items                         | 12  | List and define all variables for which data will be sought (such as PICO items, funding sources), any pre-planned data assumptions and simplifications                                                                                             | 7   |
| Outcomes and prioritization        | 13  | List and define all outcomes for which data will be sought, including prioritization of main and additional outcomes, with rationale                                                                                                                | 5-6 |
| Risk of bias in individual studies | 14  | Describe anticipated methods for assessing risk of bias of individual studies, including whether this will be done at the outcome or study level, or both; state how this information will be used in data synthesis                                | 7   |
| Data synthesis                     | 15a | Describe criteria under which study data will be quantitatively synthesised                                                                                                                                                                         | 7-8 |
|                                    | 15b | If data are appropriate for quantitative synthesis, describe planned summary measures, methods of handling data and methods of combining data from studies, including any planned exploration of consistency (such as I <sup>2</sup> , Kendall's τ) |     |
|                                    | 15c | Describe any proposed additional analyses (such as sensitivity or subgroup analyses, meta-regression)                                                                                                                                               |     |
|                                    | 15d | If quantitative synthesis is not appropriate, describe the type of summary planned                                                                                                                                                                  |     |
| Meta-bias(es)                      | 16  | Specify any planned assessment of meta-bias(es) (such as publication bias across studies, selective reporting within studies)                                                                                                                       | 7   |
| Confidence in cumulative evidence  | 17  | Describe how the strength of the body of evidence will be assessed (such as GRADE)                                                                                                                                                                  | 8   |

**\* It is strongly recommended that this checklist be read in conjunction with the PRISMA-P Explanation and Elaboration (cite when available) for important clarification on the items. Amendments to a review protocol should be tracked and dated. The copyright for PRISMA-P (including checklist) is held by the PRISMA-P Group and is distributed under a Creative Commons Attribution Licence 4.0.**

*From: Shamseer L, Moher D, Clarke M, Ghersi D, Liberati A, Petticrew M, Shekelle P, Stewart L, PRISMA-P Group. Preferred reporting items for systematic review and meta-analysis protocols (PRISMA-P) 2015: elaboration and explanation. BMJ. 2015 Jan 2;349(jan02 1):g7647.*

## Supplementary file S2

|                                   |                                                                                                                                                                                                                                                                                                                                                                                                                                                                                                                                                                                                                                                                                                                                      |
|-----------------------------------|--------------------------------------------------------------------------------------------------------------------------------------------------------------------------------------------------------------------------------------------------------------------------------------------------------------------------------------------------------------------------------------------------------------------------------------------------------------------------------------------------------------------------------------------------------------------------------------------------------------------------------------------------------------------------------------------------------------------------------------|
| Search for coenzyme Q10           | 1 Ubiquinone/<br>(ubiquinon\$ or caomet or decorenone or<br>mitocor or neuquinon\$ or ubidecarenone<br>2 or ubimaior or ubiquinol or ubiten).tw.<br>3 ((bioquinone or bio-quinone or coenzyme<br>4 or co-enzyme or quinone) adj (q\$ or<br>5 "910"))).tw.<br>6 Ubiquinol-10.tw.<br>7 q 10.tw.<br>8 coq 10.tw.<br>9 (coq10 or q10).tw.<br>10 1 or 2 or 3 or 4 or 5 or 6 or 7                                                                                                                                                                                                                                                                                                                                                          |
| Search for chronic kidney disease | 11 Kidney Diseases/<br>12 exp Renal Replacement Therapy/<br>13 Renal Insufficiency/<br>14 exp Renal Insufficiency, Chronic/<br>15 dialysis.tw.<br>16 (hemodialysis or haemodialysis or<br>17 hemodiafiltration or haemodiafiltration or<br>18 hemofiltration or haemofiltration).tw.<br>19 (kidney disease* or renal disease* or<br>20 kidney failure or renal failure).tw.<br>21 (ESRF or ESKF or ESRD or ESKD).tw.<br>22 (CKF or CKD or CRF or CRD).tw.<br>23 (PD or CAPD or CCPD or APD).tw.<br>24 Diabetic Nephropathies/<br>25 diabetic nephropath\$.tw.<br>26 diabetic kidney disease\$.tw.<br>27 Uremia/<br>28 ur?emi\$.tw.<br>29 9 or 10 or 11 or 12 or 13 or 14 or 15 or 16<br>30 or 17 or 18 or 19 or 20 or 21 or 22 or 23 |
| Search for combinations           | 31 8 and 24                                                                                                                                                                                                                                                                                                                                                                                                                                                                                                                                                                                                                                                                                                                          |
| Excluding animal studies          | 32 exp animals/ not humans.sh.<br>33 25 not 26                                                                                                                                                                                                                                                                                                                                                                                                                                                                                                                                                                                                                                                                                       |
