# Supplementary material for: Efficacy of coenzyme Q10 in patients with chronic kidney disease: protocol for a systematic review
Source: PubMed Central journal article supplement — BMJ Open. 2019 May 14;9(5):e029053. doi: 10.1136/bmjopen-2019-029053 (PMC6530451; doi:10.1136/bmjopen-2019-029053), 2019-05-14
Supplement: bmjopen-2019-029053supp002.pdf [file bmjopen-2019-029053supp002.pdf]

Supplementary file S2

---

|                                   |                                                                                                                                                                                                                                                                                                                                                                                                                                                                                                                                                                                                                                                                                                                         |
|-----------------------------------|-------------------------------------------------------------------------------------------------------------------------------------------------------------------------------------------------------------------------------------------------------------------------------------------------------------------------------------------------------------------------------------------------------------------------------------------------------------------------------------------------------------------------------------------------------------------------------------------------------------------------------------------------------------------------------------------------------------------------|
| Search for coenzyme Q10           | 1 Ubiquinone/<br>(ubiquinon\$ or caomet or decorenone or<br>mitocor or neuquinon\$ or ubidecarenone<br>2 or ubimaior or ubiquinol or ubiten).tw.<br>(bioquinone or bio-quinone or coenzyme<br>or co-enzyme or quinone) adj (q\$ or<br>3 "910")).tw.<br>4 Ubiquinol-10.tw.<br>5 q 10.tw.<br>6 coq 10.tw.<br>7 (coq10 or q10).tw.<br>8 1 or 2 or 3 or 4 or 5 or 6 or 7                                                                                                                                                                                                                                                                                                                                                    |
| Search for chronic kidney disease | 9 Kidney Diseases/<br>10 exp Renal Replacement Therapy/<br>11 Renal Insufficiency/<br>12 exp Renal Insufficiency, Chronic/<br>13 dialysis.tw.<br>(hemodialysis or haemodialysis or<br>hemodiafiltration or haemodiafiltration or<br>14 hemofiltration or haemofiltration).tw.<br>(kidney disease* or renal disease* or<br>15 kidney failure or renal failure).tw.<br>16 (ESRF or ESKF or ESRD or ESKD).tw.<br>17 (CKF or CKD or CRF or CRD).tw.<br>18 (PD or CAPD or CCPD or APD).tw.<br>19 Diabetic Nephropathies/<br>20 diabetic nephropath\$.tw.<br>21 diabetic kidney disease\$.tw.<br>22 Uremia/<br>23 ur?emi\$.tw.<br>9 or 10 or 11 or 12 or 13 or 14 or 15 or 16<br>24 or 17 or 18 or 19 or 20 or 21 or 22 or 23 |
| Search for combinations           | 25 8 and 24                                                                                                                                                                                                                                                                                                                                                                                                                                                                                                                                                                                                                                                                                                             |
| Excluding animal studies          | 26 exp animals/ not humans.sh.<br>27 25 not 26                                                                                                                                                                                                                                                                                                                                                                                                                                                                                                                                                                                                                                                                          |

---
